# Supplementary material for: A diarylethene-based fluorescent chemosensor for the sequential recognition of Fe3+ and cysteine
Source: Royal Society of Chemistry journal article supplement (doi:10.1039/c6ra05558c), 2016-01-01
Supplement: c6ra05558c1.pdf [file c6ra05558c1.pdf]

## Supplementary Information (SI)

# Diarylethene-based fluorescent chemosensor for the sequential recognition of Fe<sup>3+</sup> and cysteine

Guanming Liao, Chunhong Zheng\*, Dandan Xue, Congbin Fan, Gang Liu, Shouzhi Pu\*

*Jiangxi Key Laboratory of Organic Chemistry, Jiangxi Science and Technology Normal*

*University, Nanchang 330013, PR China*

\*Corresponding author: E-mail address: [articlechem@163.com](mailto:articlechem@163.com); [pushouzhi@tsinghua.org.cn](mailto:pushouzhi@tsinghua.org.cn);

Tel./Fax: +86-791-83831996

### Content

|                                                                                                                                                                                                              |    |
|--------------------------------------------------------------------------------------------------------------------------------------------------------------------------------------------------------------|----|
| <b>1. Supplementary data</b> .....                                                                                                                                                                           | S2 |
| <b>Fig. S1.</b> (A) The limit of detection (LOD); and (B) Benesi–Hildebrand plot based on the 1:1 for <b>1O</b> .....                                                                                        | S2 |
| <b>Fig. S2.</b> Fluorescence spectral changes of <b>1C</b> induced by Fe <sup>3+</sup> in methanol (2.0 × 10 <sup>-5</sup> mol L <sup>-1</sup> ).....                                                        | S3 |
| <b>Fig. S3.</b> (A) Mass spectra of <b>1O</b> and <b>1O'</b> ; and (B) IR spectra of <b>1O</b> (black line) and <b>1O'</b> (red line).....                                                                   | S4 |
| <b>Fig. S4.</b> Fluorescence spectral changes of <b>1C'</b> induced by Cys in methanol (2.0 × 10 <sup>-5</sup> mol L <sup>-1</sup> ).....                                                                    | S5 |
| <b>Fig. S5.</b> (A) Mass spectra of <b>1O'</b> and <b>1O'</b> induced by the stimulation of Cys; and (B) Hildebrand–Benesi plot based on the 1:1 for <b>1O'</b> ; and (C) the limit of detection (LOD) ..... | S6 |
| <b>2. NMR spectra</b> .....                                                                                                                                                                                  | S7 |
| <b>Fig. S6.</b> <sup>1</sup> H NMR (400 MHz, CDCl <sub>3</sub> ) spectrum of <b>1O</b> .....                                                                                                                 | S7 |
| <b>Fig. S7.</b> <sup>13</sup> C NMR (100 MHz, CDCl <sub>3</sub> ) spectrum of <b>1O</b> .....                                                                                                                | S8 |

## 1. Supplementary data

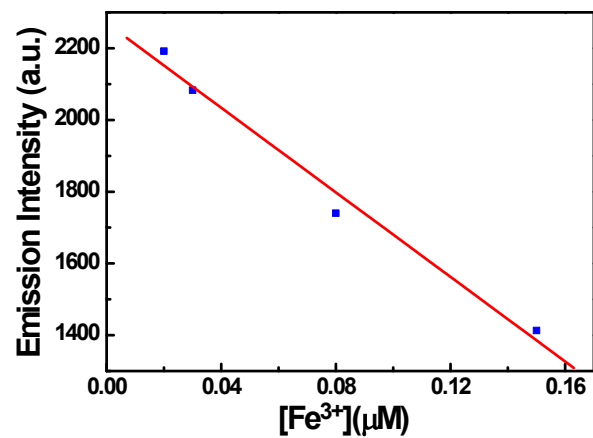

(A)

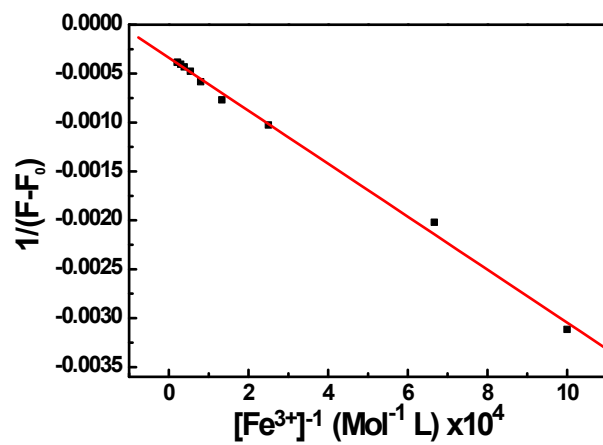

(B)

**Fig. S1.** (A) The limit of detection (LOD); and (B) Benesi–Hildebrand plot based on the 1:1 for 10.

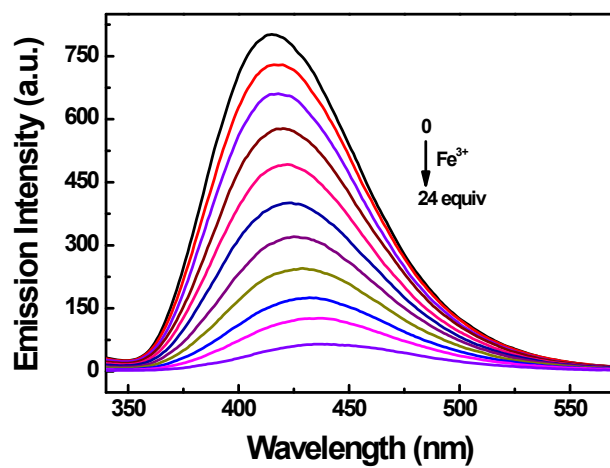

**Fig. S2.** Fluorescence spectral changes of **1C** induced by Fe<sup>3+</sup> in methanol ( $2.0 \times 10^{-5}$  mol L<sup>-1</sup>), excited at 298 nm.

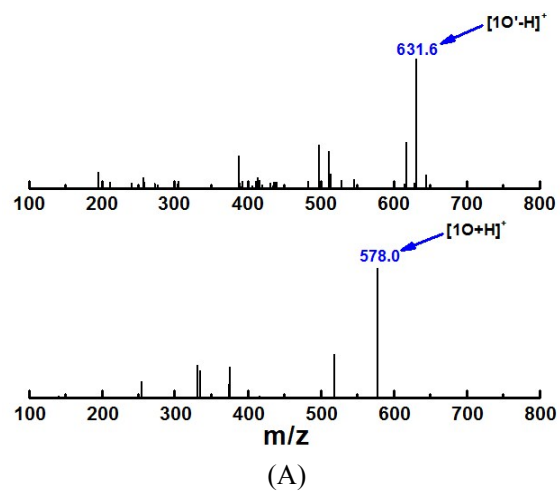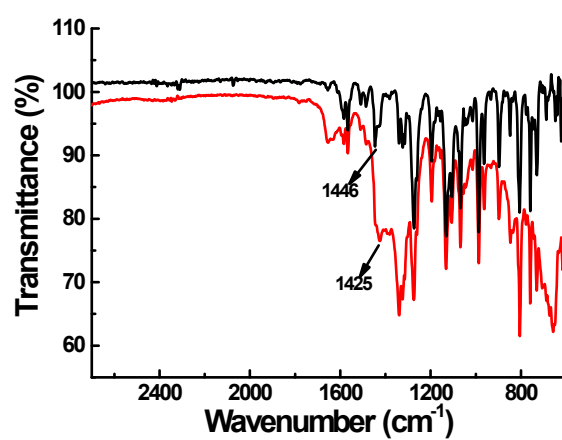

(B)

**Fig. S3.** (A) Mass spectra of **1O** and **1O'**; and (B) IR spectra of **1O** (black line) and **1O'** (red line).

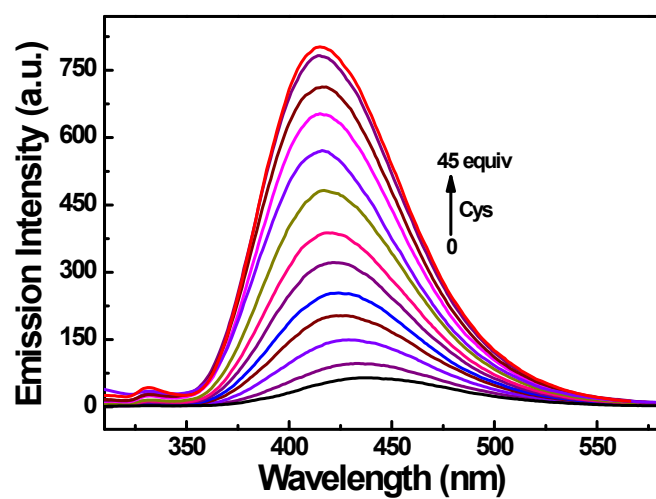

**Fig. S4.** Fluorescence spectral changes of **1C'** induced by Cys in methanol ( $2.0 \times 10^{-5}$  mol L<sup>-1</sup>), excited at 298 nm.

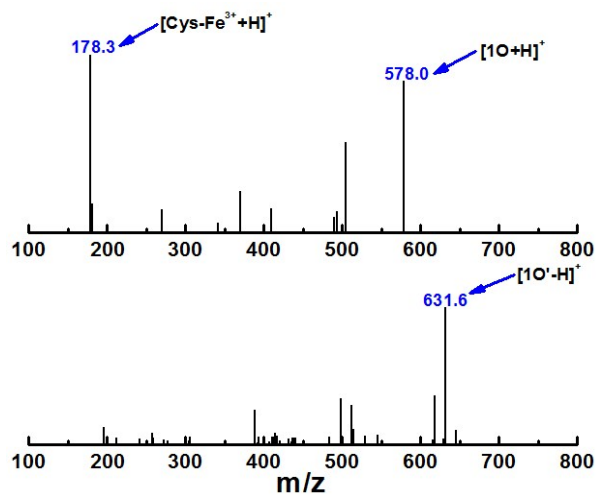

(A)

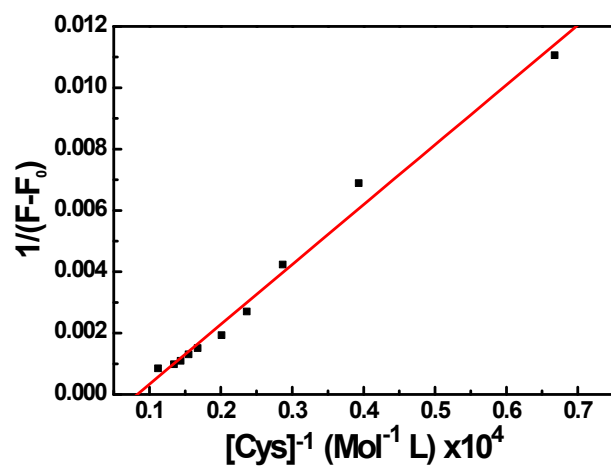

(B)

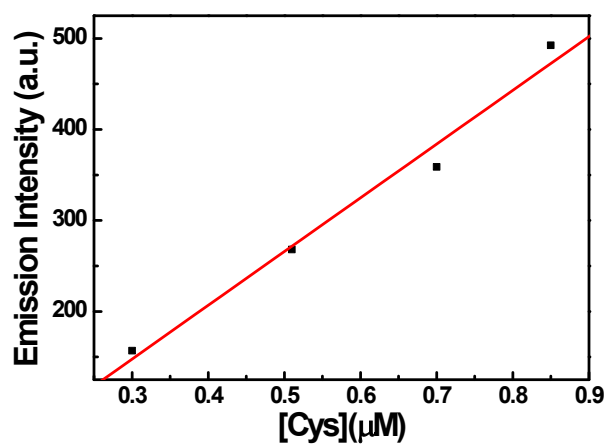

(C)

**Fig. S5.** (A) Mass spectra of **1O'** and **1O'** induced by the stimulation of Cys; and (B) Benesi-Hildebrand plot based on the 1:1 for **1O'**; and (C) the limit of detection (LOD).

## 2. NMR spectra

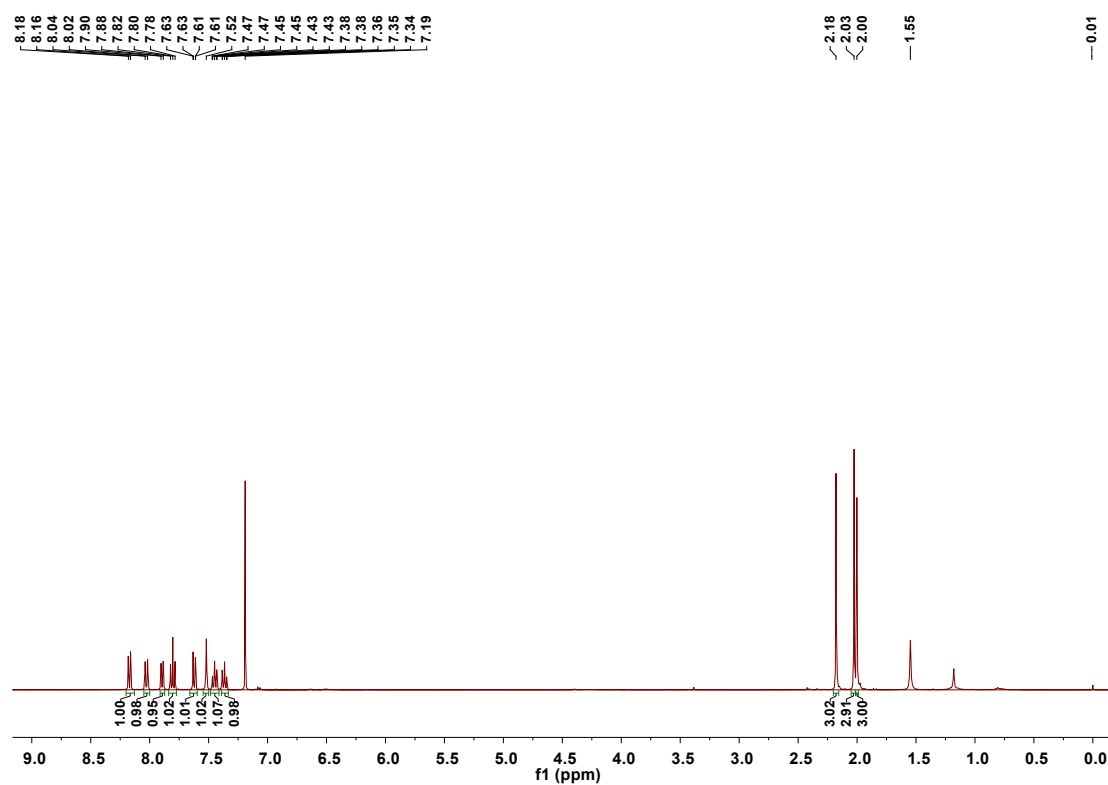

**Fig. S6.**  $^1\text{H}$  NMR (400 MHz,  $\text{CDCl}_3$ ) spectrum of **10**.

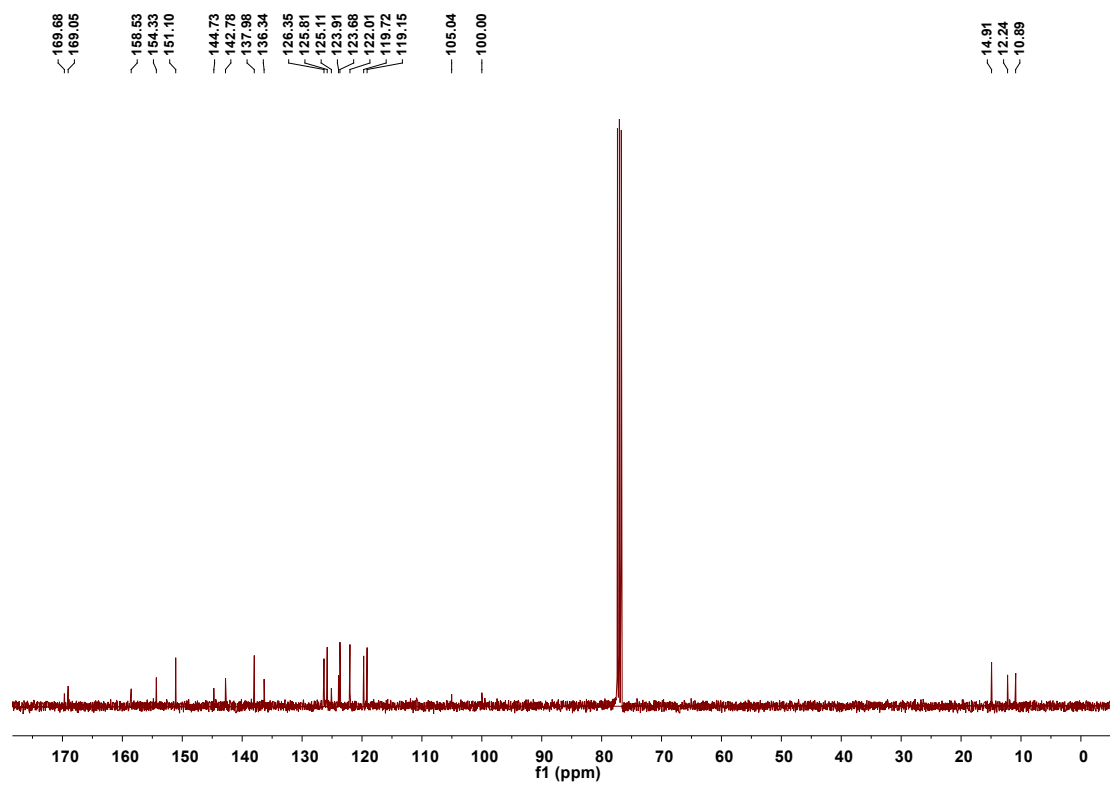

**Fig. S7.**  $^{13}\text{C}$  NMR (100 MHz,  $\text{CDCl}_3$ ) spectrum of **10**.
